# Supplementary material for: In Silico-Motivated Discovery of Novel Potent Glycogen Synthase-3 Inhibitors: 1-(Alkyl/arylamino)-3H-naphtho[1,2,3-de]quinoline-2,7-dione Identified as a Scaffold for Kinase Inhibitor Development
Source: MDPI journal article supplement (doi:10.3390/ph16050661), 2023-04-28
Supplement: s1 [file s1]

## Supporting Information

### ***In Silico*-Motivated Discovery of Novel Potent Glycogen Synthase–3 inhibitors: 1-(Alkyl/arylamino)-3H-naphtho[1,2,3-de]quinoline-2,7-dione Identified as a Scaffold for Kinase Inhibitor Development**

Thomas D. Emmerich and Joseph M. Hayes\*

*School of Pharmacy & Biomedical Sciences, University of Central Lancashire, Preston PR1*

*2HE, UK*

\* Corresponding authors  
tel: +441772894334 (JMH); email: [jhayes@uclan.ac.uk](mailto:jhayes@uclan.ac.uk)

## 1. Supplementary Information Tables

**Table S1.** The ChEMBL ID, IC<sub>50</sub> data and SMILES for the 50 known diverse actives (IC<sub>50</sub>s ≤ 500 nM) from the ChEMBL database used in the active/decoy benchmarking studies.

| ChEMBL ID     | IC <sub>50</sub> (nM) | SMILES                                                                        |
|---------------|-----------------------|-------------------------------------------------------------------------------|
| CHEMBL1254896 | 53                    | <chem>Cc1[nH]c2ccccc2c1C1=C(NCCc2ccc(F)cc2)C(=O)N(C)C1=O</chem>               |
| CHEMBL1271441 | 100                   | <chem>NC(=O)c1cc(-c2ccccc2F)[nH]c1-c1ccccc1</chem>                            |
| CHEMBL160585  | 187                   | <chem>COc1ccccc1C1=C(N2CCc3ccccc32)C(=O)NC1=O</chem>                          |
| CHEMBL1630434 | 10.8                  | <chem>Oc1ccc(Nc2ncnc3[nH]cnc23)cc1CN(CCC)CCCl</chem>                          |
| CHEMBL1630451 | 325                   | <chem>COc1ccc(-c2cc(-c3ccc(F)cc3)[nH]c(=O)c2O)cc1</chem>                      |
| CHEMBL1630483 | 53                    | <chem>COc1ccc(Nc2nnc(-c3ccc(C(F)(F)F)cc3)o2)cc1</chem>                        |
| CHEMBL1801628 | 500                   | <chem>Nc1c(Br)cc(C(=O)C(Br)Br)cc1Br</chem>                                    |
| CHEMBL182891  | 320                   | <chem>COc1ccc(-c2cc3c(NC(=O)CC4CCCC4)ncnc3o2)cc1</chem>                       |
| CHEMBL1830063 | 4                     | <chem>O=C1Nc2ccccc2/C1=C1/Nc2cc(Br)ccc2C1=O</chem>                            |
| CHEMBL1938959 | 490                   | <chem>Cc1ccccc1-n1cc(-c2ccccc2)nn1</chem>                                     |
| CHEMBL1957231 | 5.012                 | <chem>COc1ccc(-c2ocnc2C(=O)NCc2ccn3ccnc3c2)cc1Cl</chem>                       |
| CHEMBL1969664 | 31                    | <chem>N#Cc1ccc2[nH]c(O)c(-c3ccc(CN4CCOCC4)cn3)c2c1</chem>                     |
| CHEMBL2022413 | 300                   | <chem>Br.OCC/N=c1\nc(-c2ccccc2)n(-c2ccccc3ccccc23)s1</chem>                   |
| CHEMBL2024372 | 500                   | <chem>Br.CCOC(=O)C/N=c1\nc(-c2ccc(OC)cc2)n(-c2ccccc2)s1</chem>                |
| CHEMBL2048673 | 9                     | <chem>O=C(NCCc1ccccc1Cl)c1ccnc2[nH]c(-c3ccccc3)nc12</chem>                    |
| CHEMBL2064628 | 227                   | <chem>CN(C)C[C@@H](OC(=O)N1Cc2c(NC(=O)C(C)(C)C)n[nH]c2C1(C)C)c1ccccc1</chem>  |
| CHEMBL2094331 | 4.19                  | <chem>O=C1Nc2ccccc2/C1=C1/c1ccccc1</chem>                                     |
| CHEMBL215803  | 13                    | <chem>C[C@@H]1C[C@H]2CN1CCn1nc3c(cccc3c1O)-c1nc3c(cccc3nc1O)O2</chem>         |
| CHEMBL2297166 | 120                   | <chem>Cc1ccc(-c2c[nH]c(C3COCCN3Cc3c[nH]c4ccccc34)n2)cc1</chem>                |
| CHEMBL254582  | 200                   | <chem>Cc1cccc(N2CCN(CCCNC(=O)c3nc(-c4ccccc4)no3)C(C)C2)c1</chem>              |
| CHEMBL259271  | 5                     | <chem>CCN1CCN(CCCCC(=O)Nc2n[nH]c3nnc(-c4ccccc4)cc23)CC1</chem>                |
| CHEMBL270473  | 1.5                   | <chem>Cc1cc(-c2cc(-c3nc4ccc(CN5CCN(C)CC5)cc4[nH]3)c(=O)[nH]n2)cc(C)c1O</chem> |
| CHEMBL303321  | 6.31                  | <chem>COc1ccccc(-n2ccc3c(N/N=C/c4ccc(OCCN(C)C)cc4)ncnc32)c1</chem>            |
| CHEMBL3110144 | 240                   | <chem>Cc1nn(-c2ccc(Cl)cc2Cl)c2c1c1c(c3cccn32)C(=O)NC1=O</chem>                |
| CHEMBL317657  | 14                    | <chem>O=C(Nc1n[nH]c2nc(-c3ccccc3)c(Br)cc12)C1CCN(Cc2ccccc2)C1</chem>          |
| CHEMBL328194  | 75                    | <chem>COc1cc2c(cc1OC)-c1[nH]c3ccc(C(F)(F)F)cc3c1CC(=O)N2</chem>               |
| CHEMBL357136  | 500                   | <chem>O=C(CCl)c1ccc(Br)c1Br</chem>                                            |
| CHEMBL361567  | 80                    | <chem>COc1ccc(-c2oc3ncnc(N)c3c2-c2ccccc2)cc1</chem>                           |
| CHEMBL362155  | 50.12                 | <chem>FC(F)(F)c1ccccc(-c2nn3ncccc3c2-c2ccnc(Nc3ccc4c(c3)OCCO4)n2)c1</chem>    |
| CHEMBL3661029 | 50                    | <chem>Fc1cnc2[nH]nc(Nc3cc(C(F)(F)F)cc(-c4ccccc4Cl)n3)c2c1</chem>              |
| CHEMBL3735603 | 20                    | <chem>COc1ccccc1-c1ccc2[nH]nc(C(=O)NCC3CCN(CCc4ccccc4)CC3)c2c1</chem>         |
| CHEMBL3735890 | 6.1                   | <chem>COc1ccc2c(c1C(C)N1CCNCC1)O/C(=C/c1n[nH]c3nccccc13)C2=O</chem>           |
| CHEMBL3891139 | 46                    | <chem>O=C(/C=C/c1cnc2[nH]cc(-c3ccccc3)c2c1)NCCN1CCOCC1</chem>                 |
| CHEMBL398621  | 35                    | <chem>Clc1ccccc1-c1cc(NCOc2ccccc2)n2ncc(Br)c2n1</chem>                        |
| CHEMBL403405  | 30                    | <chem>COc1ccccc(Nc2nccc(C3=C(c4ccccc4)NN4C=CC=CC34)n2)c1</chem>               |
| CHEMBL4071429 | 1.7                   | <chem>COc1cc(F)cc(F)c1C1CN(c2nc(-c3ccccc3)cc(=O)n2C)CCN1.Cl</chem>            |
| CHEMBL4077172 | 5                     | <chem>O=C1Cc2cc(Br)ccc2/C1=C1/[nH]c2ccccc2/c1=C\O</chem>                      |
| CHEMBL4162850 | 1.3                   | <chem>O=CN1Cc2ccccc3c(C4=C(c5cnc6ccccc56)C(=O)NC4=O)cn(c23)CC1N1CCOCC1</chem> |
| CHEMBL445813  | 200                   | <chem>O=C(NC1CCNCC1)c1n[nH]cc1NC(=O)c1c(Cl)ccccc1Cl</chem>                    |
| CHEMBL4568120 | 218                   | <chem>C=CCOC(=O)c1cc(-c2ccc(/C=C3/NC(=S)NC3=O)o2)ccc1Cl</chem>                |
| CHEMBL4592870 | 471                   | <chem>COc1ccccc(CCC(=O)Nc2cc(-c3[nH]c(SC)nc3-c3ccc(F)cc3)ccn2)c1</chem>       |
| CHEMBL461139  | 300                   | <chem>O=c1[nH]cnc2[nH]c(-c3ccnc(/C=C/c4ccc(CN5CCOCC5)cc4)c3)cc12</chem>       |
| CHEMBL4635819 | 82                    | <chem>Cc1ccc(-n2cc(CSC3=NC(c4ccccc4)CC(=O)N3C)nn2)cc1C</chem>                 |
| CHEMBL4643895 | 390                   | <chem>CCc1ccc(-n2cc(CSc3nnc(Cn4c(C(F)(F)F)nc5ccccc54)o3)nn2)cc1</chem>        |
| CHEMBL484685  | 16.1                  | <chem>Cn1cc(C2=C(c3ccccc3F)cc34)C(=O)NC2=O)c2cc(C#CC3CC3)ccc21</chem>         |
| CHEMBL495039  | 35                    | <chem>COc1cc(NCCCN)c2nccc(C)c2c1Oc1ccccc(C(F)(F)F)c1</chem>                   |
| CHEMBL513570  | 2.5                   | <chem>COc1ccc(-n2cnc3ccc(-c4nnc(SCc5ccccc(C(F)(F)F)c5)o4)cc32)cc1</chem>      |
| CHEMBL564450  | 0.14                  | <chem>COc1cc(C2=C(c3en(CCN4CCN(C)CC4)c4ccccc34)C(=O)NC2=O)c2ccccc2c1</chem>   |

|              |     |                                                                 |
|--------------|-----|-----------------------------------------------------------------|
| CHEMBL570580 | 92  | <chem>CCc1cc2c(c3cc(OC)c(OC)cc13)C(=O)NC2=O</chem>              |
| CHEMBL575882 | 190 | <chem>CC[S@@+]([O-])c1ccc(-c2cc3ccc(-c4ccc(C)o4)cc23)cc1</chem> |

**Table S2.** Three-point pharmacophore hypotheses results generated using the program Phase v6.7. The ADR *hypothesis 4* pharmacophore (Figure 2) was chosen due to the requirement for a filter containing both the hydrogen bond acceptor (A) and donor (D) features for hinge region binding. *Hypothesis 4* was the best of the A and D feature pharmacophores through its S<sub>adj</sub> score (2.470) and had the highest number of matched actives (40) for all hypotheses; the hypothesis identified an aromatic ring group (R) as the third important binding feature for actives.

| Hypothesis | Features <sup>a</sup> | Survival Score | Survival Inactives | S <sub>adj</sub> <sup>b</sup> | # Matches <sup>c</sup> |
|------------|-----------------------|----------------|--------------------|-------------------------------|------------------------|
| 1          | DRR                   | 4.321          | 1.785              | 2.536                         | 35                     |
| 2          | DRR                   | 4.282          | 1.863              | 2.419                         | 31                     |
| 3          | DRR                   | 4.250          | 1.719              | 2.531                         | 30                     |
| <b>4</b>   | <b>ADR</b>            | <b>4.043</b>   | <b>1.573</b>       | <b>2.470</b>                  | <b>40</b>              |
| 5          | DRR                   | 4.307          | 1.908              | 2.399                         | 35                     |
| 6          | ADR                   | 4.040          | 1.595              | 2.445                         | 33                     |
| 7          | ADR                   | 3.932          | 1.484              | 2.448                         | 29                     |

<sup>a</sup>D = H-bond donor group, R = Aromatic Ring group, and A = H-bond acceptor group. <sup>b</sup> Adjusted survival score (survival score – survival inactives). <sup>c</sup> The total number of surviving actives from the initial 50.

**Table S3.** QikProp v6.8 calculated CNS-activity relevant properties MW, CNS activity score, log BB and polar surface area (PSA) and for a selection of eighteen drugs currently used to treat different CNS conditions.

| <b>Drug</b>              | <b>MW<br/>(Da)</b> | <b>CNS</b> | <b>log BB</b> | <b>PSA<br/>(Å<sup>2</sup>)</b> |
|--------------------------|--------------------|------------|---------------|--------------------------------|
| <b>Carbamazepine</b>     | 265.4              | 2          | 0.81          | 18.7                           |
| <b>Clonazepam</b>        | 315.7              | -2         | -1.08         | 102.2                          |
| <b>Codeine</b>           | 299.3              | 2          | 0.45          | 43.5                           |
| <b>Dextroamphetamine</b> | 135.2              | 1          | 0.42          | 25.0                           |
| <b>Diazepam</b>          | 284.7              | 1          | 0.20          | 47.7                           |
| <b>Donepezil</b>         | 236.3              | 0          | -0.19         | 51.6                           |
| <b>Eszopiclone</b>       | 388.8              | 1          | -0.14         | 109.0                          |
| <b>Lisdexamfetamine</b>  | 263.3              | -1         | -0.72         | 86.4                           |
| <b>Memantine</b>         | 379.5              | 1          | 0.10          | 50.1                           |
| <b>Mephobarbital</b>     | 246.2              | 0          | -0.39         | 86.2                           |
| <b>Methadone</b>         | 295.4              | 1          | 0.35          | 25.4                           |
| <b>Methylphenidate</b>   | 233.3              | 1          | 0.30          | 46.6                           |
| <b>Mirtazapine</b>       | 179.3              | 2          | 0.54          | 25.4                           |
| <b>Morphine</b>          | 285.3              | 1          | 0.05          | 57.9                           |
| <b>Naloxone</b>          | 327.3              | 1          | -0.32         | 79.5                           |
| <b>Pentobarbital</b>     | 226.3              | 0          | -0.63         | 97.4                           |
| <b>Phenobarbital</b>     | 232.2              | -1         | -0.55         | 100.8                          |
| <b>Zolpidem</b>          | 307.3              | 1          | 0.04          | 42.0                           |



## 2. Supplementary Information Figures

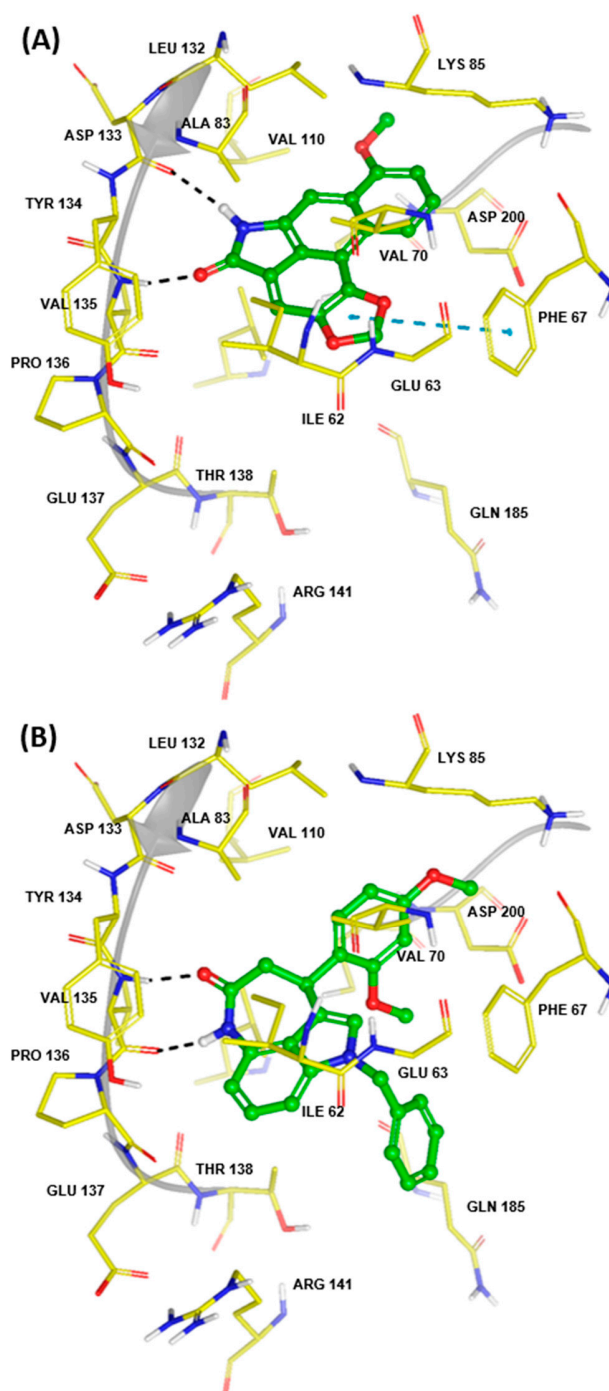

**Figure S1.** Predicted Glide-SP docking poses of the *generation I* compounds **3** (A) and **4** (B) from initial *in silico* screening of the biogenic database of ZINC15. Both compounds form hinge region hydrogen bonds with backbone Val135 NH and Asp133 O. For **3**, the dioxolo-ring is T-shaped with respect to the Phe67 side-chain phenyl, and for compound **4**, the phenyl group is close to forming parallel displaced  $\pi$ - $\pi$  interactions with the same side-chain.

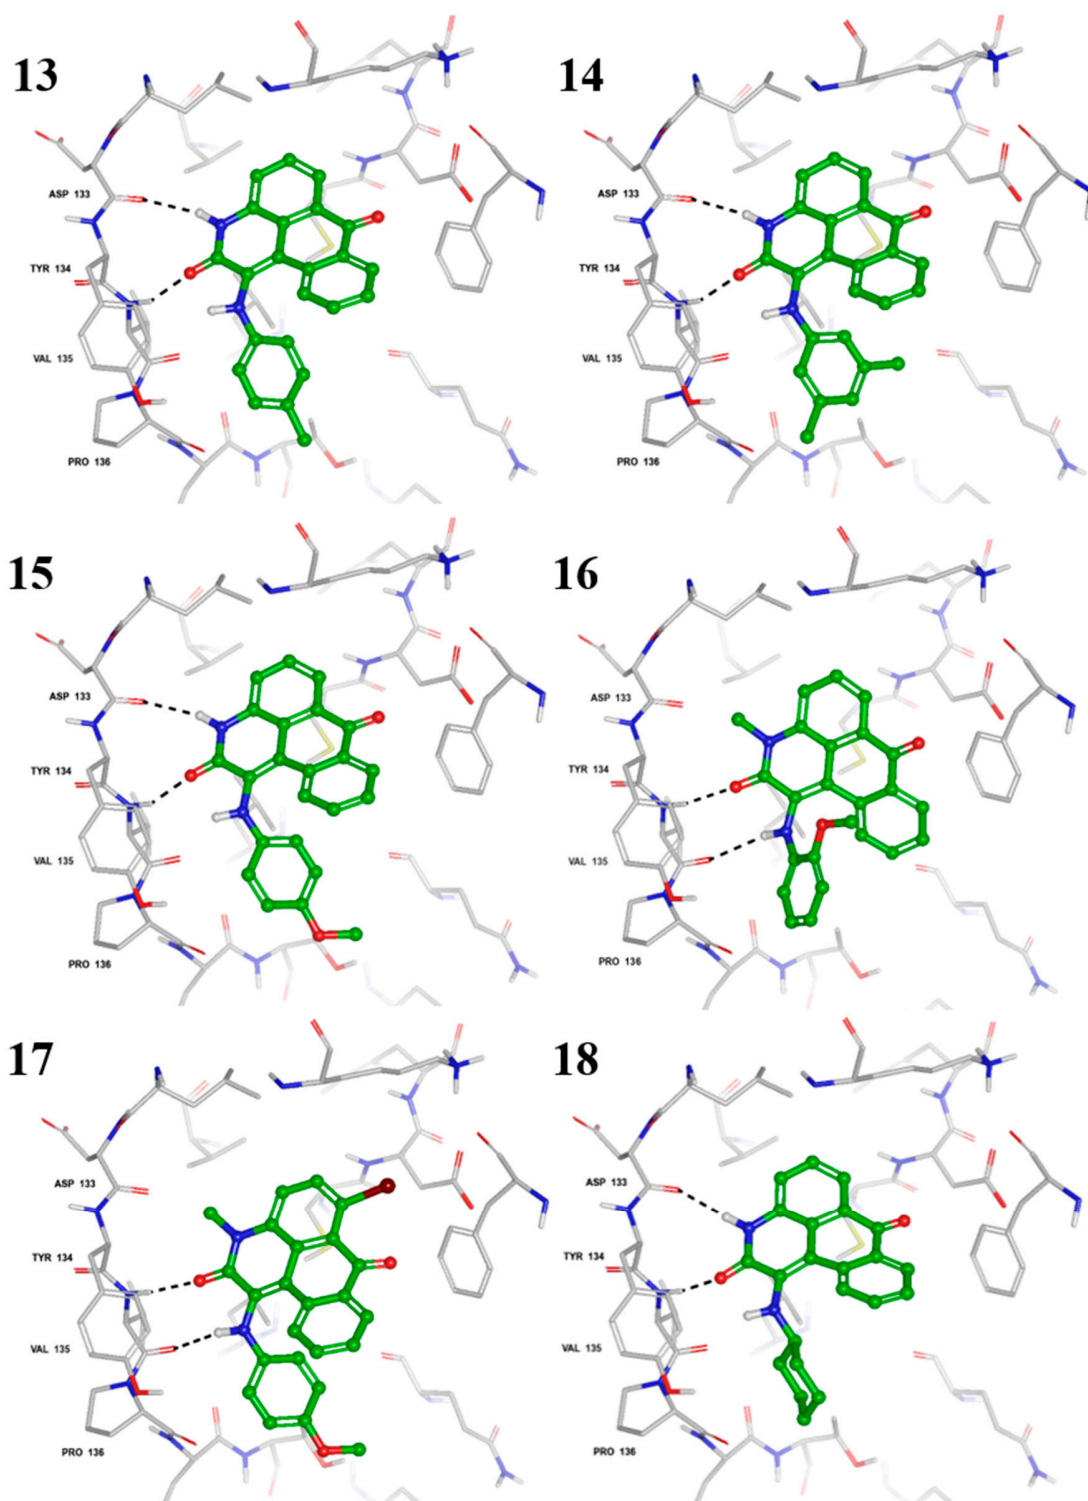

**Figure S2.** Predicted binding of the *generation II* set of 1-(alkyl/aryl)amino-3H-naphtho[1,2,3-de]quinoline-2,7-dione analogues (13–22, Figure 5) of hit compound 2 from the Glide-SP docking.



19

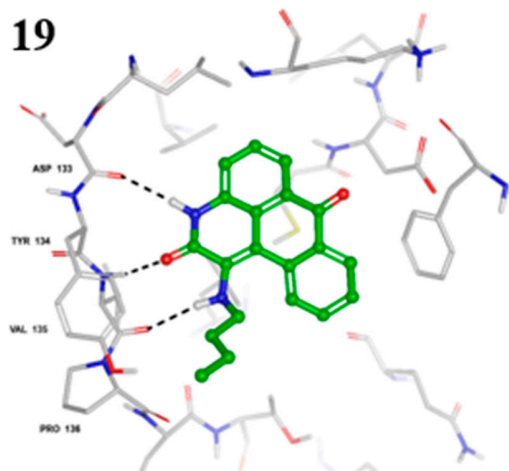

20

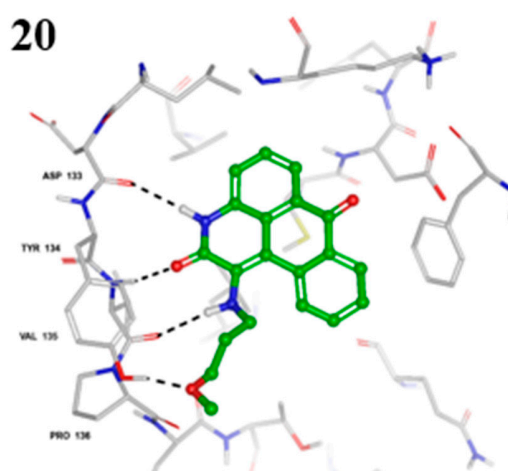

21

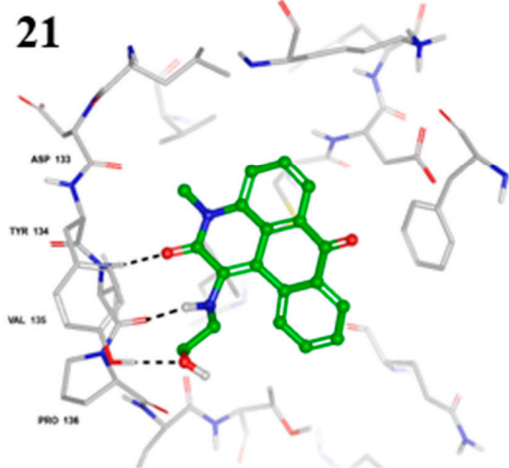

22

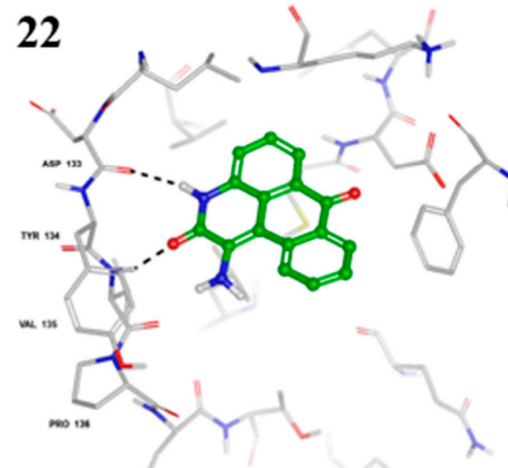

**Figure S2 (continued).** Predicted binding of the *generation II* set of 1-(alkyl/arylamino)-3H-naphtho[1,2,3-de]quinoline-2,7-dione analogues (**13–22**, Figure 5) of hit compound **2** from the Glide-SP docking.
